# Supplementary material for: Structural basis for abscisic acid efflux mediated by ABCG25 in Arabidopsis thaliana
Source: PubMed Central journal article supplement (PMC10581904; doi:10.1038/s41477-023-01510-0), 2023-09-04
Supplement: 41477_2023_1510_MOESM1_ESM.pdf [file 41477_2023_1510_MOESM1_ESM.pdf]

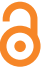

---

# Structural basis for abscisic acid efflux mediated by ABCG25 in *Arabidopsis thaliana*

---

In the format provided by the authors and unedited

**Supplementary Table 1 | Primers used in this study.**

| <b>Primer name</b> | <b>Primer sequence</b>                         |
|--------------------|------------------------------------------------|
| <b>ABCG25-FW</b>   | GATGACGATGACAAGCATATGTCAGCTTTTGACGGCGTTG       |
| <b>ABCG25-RV</b>   | GTACCGCATGCCTCGACCTCGAGTTAATGTTTGATACGTCTCAAAG |
| <b>E232Q-FW</b>    | GAGTCTTTTGGTTCTTGATCAGCCTACTTCGGGTCTTGATG      |
| <b>E232Q-RV</b>    | CATCAAGACCCGAAGTAGGCTGATCAAGAACCAAAAGACTC      |
| <b>Q413A-FW</b>    | CTTCGCATTTTCGCAGTCGTCGCGGCTTCGATC              |
| <b>Q413A-RV</b>    | GAAGCCGCGACGACTGCGAAAATGCGAAGTAAGTC            |
| <b>I445A-FW</b>    | CTTCTTCATATCCGCCTTTTGGGGAGTACTTCCATC           |
| <b>I445A-RV</b>    | GTAATCCCAAAAGGCGGATATGAAGAAGAGTAG              |
| <b>V449A-FW</b>    | CATCTTTTGGGGAGCACTTCCATCATTAAACGCGGTC          |
| <b>V449A-RV</b>    | GTAAATGATGGAAGTGCTCCCAAAAGATGGATATG            |
| <b>F453A-FW</b>    | GTAATCCCAAAAGGCGGATATGAAGAAGAGTAG              |
| <b>F453A-RV</b>    | GAAGACCGCGTTAGCTGATGGAAGTACTCCCAAAAG           |
| <b>T552A-FW</b>    | GTCTACAATCGTGGCCGTGACAATGCTAGCGTTTG            |
| <b>T552A-RV</b>    | CTAGCATTGTCACGGCCACGATTGTAGAC                  |
| <b>L556A-FW</b>    | GACCGTGACAATGGCAGCGTTTGTCTTAACCGGTG            |
| <b>L556A-RV</b>    | GTAAAGACAAACGCTGCCATTGTCACGGTCACGATTG          |
| <b>V559A-FW</b>    | CAATGCTAGCGTTTGCCTTAACCGGTGGTTACTAC            |
| <b>V559A-RV</b>    | GTAACCACCGGTAAAGGCAAACGCTAGCATTGTCAC           |
| <b>Y565A-FW</b>    | CTTAACCGGTGGTTACGCCGTCAACAAAGTGCCATC           |
| <b>Y565A-RV</b>    | CACTTTGTTGACGGCGTAACCACCGGTAAAGAC              |
| <b>K545A-FW</b>    | GATCATGGACGCTGCAAAAGCGTCTACAATCGTG             |
| <b>K545A-RV</b>    | GATTGTAGACGCTTTTGCAGCGTCCATGATCGCTGC           |
