# Supplementary material for: Structural basis for abscisic acid efflux mediated by ABCG25 in Arabidopsis thaliana
Source: PubMed Central journal article supplement (PMC10581904; doi:10.1038/s41477-023-01510-0), 2023-09-04
Supplement: 41477_2023_1510_MOESM4_ESM.pdf [file 41477_2023_1510_MOESM4_ESM.pdf]

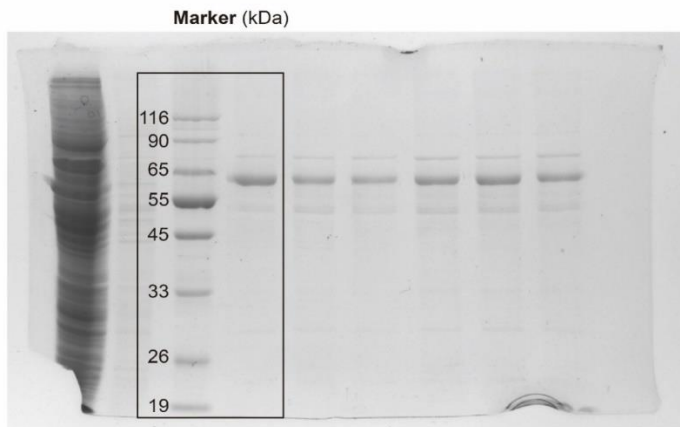

**Uncropped SDS-PAGE gel for the WT *AtABCG25* purified with DDM plus CHS extraction. Related to Extended Data Fig. 3a.**

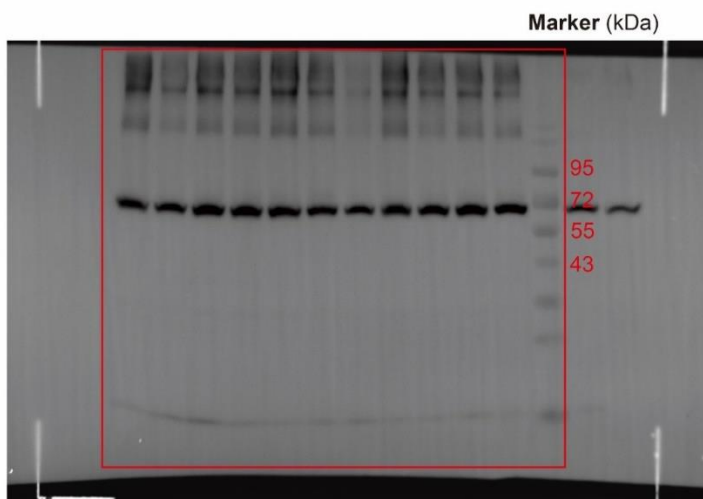

**Uncropped Western blot of *AtABCG25* variants using anti-Flag antibody. Related to Extended Data Fig. 5i.**

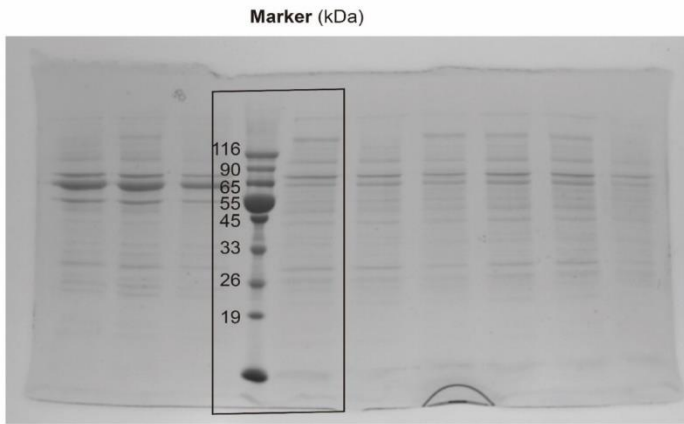

**Uncropped SDS-PAGE gel for the WT *AtABCG25* purified with DDM extraction. Related to Extended Data Fig. 6e.**

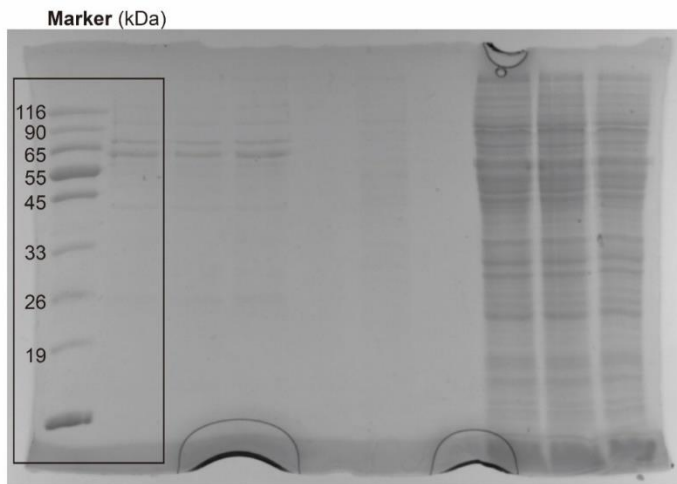

**Uncropped SDS-PAGE gel for the WT *AtABCG25* purified with DDM extraction and ABA-added during the whole purification steps. Related to Extended Data Fig. 6h.**

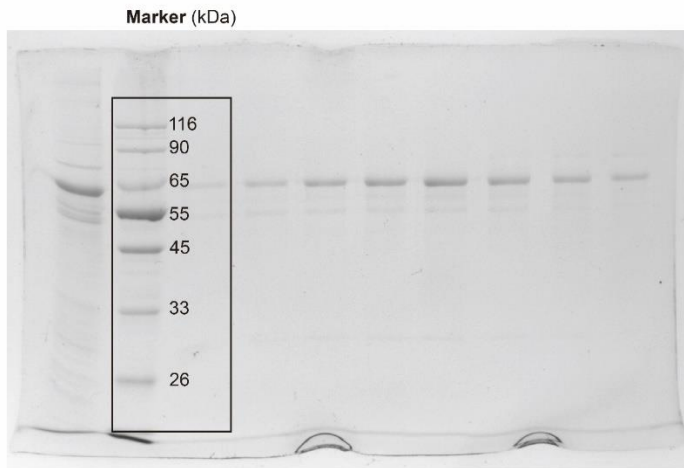

**Uncropped SDS-PAGE gel for the E232Q mutant of *AtABCG25*. Related to Extended Data Fig. 8a.**
